# Supplementary material
Source: publisher site journal article supplement (https://www.spandidos-publications.com/6006/downloadSupplementary)
Supplement: Supplementary file 1 [file downloadSupplementary]

## Sheet: Sheet1
Supplementary Table V. Pathway enrichment of DEGs by KEGG analysis. KEGG: Kyoto Encyclopedia of Genes and Genomes; DEGs: differentially expressed genes.
Term	ID	Input number	Background number	P-Value	Corrected P-Value	Input	Hyperlink
Hematopoietic cell lineage	hsa04640	20	97	1.69e-14	4.45e-12	CR2|IL7R|HLA-DRA|CR1|IL4R|HLA-DPB1|CD3D|ITGA6|CD3E|CD5|FLT3LG|ITGAM|HLA-DOB|CSF3R|HLA-DPA1|CD1C|HLA-DMB|IL1R2|IL1R1|ANPEP	http://www.genome.jp/kegg-bin/show_pathway?hsa04640/hsa:2323%09red/hsa:3575%09red/hsa:3554%09red/hsa:1378%09red/hsa:911%09red/hsa:3684%09red/hsa:1380%09red/hsa:916%09red/hsa:290%09red/hsa:3113%09red/hsa:921%09red/hsa:1441%09red/hsa:3566%09red/hsa:3109%09red/hsa:915%09red/hsa:3122%09red/hsa:7850%09red/hsa:3125%09red/hsa:3112%09red/hsa:3655%09red
Th17 cell differentiation	hsa04659	16	107	4.93e-10	5.07e-08	HLA-DPB1|IL2RB|IL4R|CD3D|HLA-DRA|RORA|CD3E|MAPK14|PRKCQ|CD247|HLA-DOB|HLA-DPA1|HLA-DMB|GATA3|IL1R1|LCK	http://www.genome.jp/kegg-bin/show_pathway?hsa04659/hsa:2625%09red/hsa:1432%09red/hsa:3554%09red/hsa:3560%09red/hsa:5588%09red/hsa:919%09red/hsa:6095%09red/hsa:916%09red/hsa:3932%09red/hsa:3113%09red/hsa:3112%09red/hsa:3566%09red/hsa:3109%09red/hsa:915%09red/hsa:3122%09red/hsa:3125%09red
Th1 and Th2 cell differentiation	hsa04658	15	92	5.9e-10	5.07e-08	HLA-DPB1|IL2RB|STAT4|IL4R|CD3D|HLA-DRA|CD3E|MAPK14|PRKCQ|CD247|HLA-DOB|HLA-DPA1|HLA-DMB|GATA3|LCK	http://www.genome.jp/kegg-bin/show_pathway?hsa04658/hsa:2625%09red/hsa:919%09red/hsa:6775%09red/hsa:3560%09red/hsa:5588%09red/hsa:1432%09red/hsa:3566%09red/hsa:916%09red/hsa:3932%09red/hsa:3113%09red/hsa:3112%09red/hsa:915%09red/hsa:3109%09red/hsa:3122%09red/hsa:3125%09red
Asthma	hsa05310	10	31	1.62e-09	1.07e-07	HLA-DPB1|RNASE3|FCER1A|CD40|HLA-DRA|HLA-DOB|HLA-DPA1|CD40LG|HLA-DMB|MS4A1	http://www.genome.jp/kegg-bin/show_pathway?hsa05310/hsa:6037%09red/hsa:958%09red/hsa:3113%09red/hsa:3112%09red/hsa:959%09red/hsa:3109%09red/hsa:2206%09red/hsa:3122%09red/hsa:2205%09red/hsa:3125%09red
Pathways in cancer	hsa05200	33	530	1.84e-09	1.07e-07	IL7R|RASGRP1|RASGRP4|BIRC3|ITGA6|FOXO1|TRAF5|STAT4|CCNA1|GADD45A|GNG11|GADD45G|GNB5|ETS1|MYC|TCF7|IL4R|CAMK2D|PRKACB|PPARG|FLT3LG|CSF3R|VEGFB|HGF|LEF1|ADCY4|IL2RB|PLD1|FN1|HMOX1|GNG7|CDK4|MMP9	http://www.genome.jp/kegg-bin/show_pathway?hsa05200/hsa:3560%09red/hsa:2791%09red/hsa:10125%09red/hsa:3566%09red/hsa:1019%09red/hsa:1441%09red/hsa:6932%09red/hsa:330%09red/hsa:115727%09red/hsa:2335%09red/hsa:7188%09red/hsa:3162%09red/hsa:196883%09red/hsa:10681%09red/hsa:8900%09red/hsa:3655%09red/hsa:5337%09red/hsa:2788%09red/hsa:3575%09red/hsa:6654%09red/hsa:7423%09red/hsa:10912%09red/hsa:1647%09…
Transcriptional misregulation in cancer	hsa05202	19	186	4.1e-09	2.15e-07	IL1R2|IL2RB|CEBPE|CCNA1|GADD45A|CD40|BIRC3|ELANE|MEIS1|BCL11B|PPARG|FOXO1|ITGAM|GADD45G|MMP9|MPO|MYC|BCL6|HPGD	http://www.genome.jp/kegg-bin/show_pathway?hsa05202/hsa:1647%09red/hsa:3248%09red/hsa:4318%09red/hsa:5468%09red/hsa:1991%09red/hsa:1053%09red/hsa:3560%09red/hsa:8900%09red/hsa:330%09red/hsa:3684%09red/hsa:958%09red/hsa:64919%09red/hsa:4211%09red/hsa:4609%09red/hsa:10912%09red/hsa:604%09red/hsa:7850%09red/hsa:4353%09red/hsa:2308%09red
Primary immunodeficiency	hsa05340	10	37	6.83e-09	3.27e-07	IL7R|ICOS|CD40LG|CD40|LCK|UNG|CD79A|CD3D|CD3E|BLNK	http://www.genome.jp/kegg-bin/show_pathway?hsa05340/hsa:29851%09red/hsa:7374%09red/hsa:973%09red/hsa:3575%09red/hsa:29760%09red/hsa:916%09red/hsa:915%09red/hsa:958%09red/hsa:3932%09red/hsa:959%09red
Inflammatory bowel disease (IBD)	hsa05321	12	65	9.05e-09	3.97e-07	HLA-DPB1|HLA-DRA|STAT4|IL4R|IL18RAP|IL18R1|RORA|HLA-DOB|TLR5|HLA-DPA1|HLA-DMB|GATA3	http://www.genome.jp/kegg-bin/show_pathway?hsa05321/hsa:2625%09red/hsa:7100%09red/hsa:6775%09red/hsa:8807%09red/hsa:8809%09red/hsa:6095%09red/hsa:3113%09red/hsa:3112%09red/hsa:3566%09red/hsa:3109%09red/hsa:3122%09red/hsa:3125%09red
Epstein-Barr virus infection	hsa05169	19	201	1.31e-08	5.29e-07	CR2|HLA-DPB1|HLA-DRA|TRAF5|CCNA1|GADD45A|CD40|GADD45G|MAPK14|CD3D|CD247|CDK4|MAP2K6|HLA-DOB|HLA-DPA1|MYC|HLA-DMB|CD3E|BLNK	http://www.genome.jp/kegg-bin/show_pathway?hsa05169/hsa:1647%09red/hsa:919%09red/hsa:7188%09red/hsa:3122%09red/hsa:29760%09red/hsa:1432%09red/hsa:1380%09red/hsa:958%09red/hsa:916%09red/hsa:3113%09red/hsa:1019%09red/hsa:915%09red/hsa:3109%09red/hsa:4609%09red/hsa:10912%09red/hsa:8900%09red/hsa:3125%09red/hsa:3112%09red/hsa:5608%09red
Human T-cell leukemia virus 1 infection	hsa05166	19	219	4.64e-08	1.74e-06	ADCY4|HLA-DPB1|IL2RB|CD3E|CCNA1|HLA-DMB|CREB5|CD40|HLA-DRA|ETS1|CDK4|HLA-DOB|PRKACB|HLA-DPA1|MYC|CD3D|IL1R2|IL1R1|LCK	http://www.genome.jp/kegg-bin/show_pathway?hsa05166/hsa:2113%09red/hsa:3554%09red/hsa:9586%09red/hsa:3932%09red/hsa:3560%09red/hsa:196883%09red/hsa:916%09red/hsa:915%09red/hsa:958%09red/hsa:5567%09red/hsa:3113%09red/hsa:1019%09red/hsa:3109%09red/hsa:4609%09red/hsa:3122%09red/hsa:8900%09red/hsa:7850%09red/hsa:3125%09red/hsa:3112%09red
Cytokine-cytokine receptor interaction	hsa04060	21	294	2.01e-07	7.03e-06	IL7R|IL1RN|IL2RB|CD40LG|IL4R|IL18RAP|TNFRSF17|CD27|IL18R1|LTB|CD40|CCR1|IFNLR1|PF4|TNFRSF25|CCR7|CCR6|CSF3R|IL1R2|IL1R1|CXCL16	http://www.genome.jp/kegg-bin/show_pathway?hsa04060/hsa:8807%09red/hsa:163702%09red/hsa:1230%09red/hsa:1236%09red/hsa:3554%09red/hsa:3557%09red/hsa:7850%09red/hsa:3560%09red/hsa:3575%09red/hsa:8809%09red/hsa:58191%09red/hsa:3566%09red/hsa:958%09red/hsa:1235%09red/hsa:1441%09red/hsa:5196%09red/hsa:608%09red/hsa:8718%09red/hsa:939%09red/hsa:959%09red/hsa:4050%09red
Intestinal immune network for IgA production	hsa04672	9	49	6.84e-07	2.25e-05	HLA-DPB1|ICOS|CD40LG|CD40|HLA-DRA|TNFRSF17|HLA-DOB|HLA-DPA1|HLA-DMB	http://www.genome.jp/kegg-bin/show_pathway?hsa04672/hsa:29851%09red/hsa:608%09red/hsa:959%09red/hsa:958%09red/hsa:3113%09red/hsa:3112%09red/hsa:3109%09red/hsa:3122%09red/hsa:3125%09red
T cell receptor signaling pathway	hsa04660	12	103	8.33e-07	2.58e-05	ICOS|RASGRP1|CD40LG|ITK|LCK|MAPK14|PRKCQ|CD247|CDK4|HGF|CD3D|CD3E	http://www.genome.jp/kegg-bin/show_pathway?hsa04660/hsa:29851%09red/hsa:919%09red/hsa:3932%09red/hsa:5588%09red/hsa:3702%09red/hsa:10125%09red/hsa:1432%09red/hsa:915%09red/hsa:916%09red/hsa:6654%09red/hsa:1019%09red/hsa:959%09red
Osteoclast differentiation	hsa04380	13	128	1.22e-06	3.56e-05	SIRPG|SIRPA|NCF4|OSCAR|CAMK4|MAPK14|PPARG|MAP2K6|SIRPB1|LILRA5|LCK|IL1R1|BLNK	http://www.genome.jp/kegg-bin/show_pathway?hsa04380/hsa:4689%09red/hsa:1432%09red/hsa:3554%09red/hsa:140885%09red/hsa:126014%09red/hsa:814%09red/hsa:29760%09red/hsa:3932%09red/hsa:353514%09red/hsa:55423%09red/hsa:10326%09red/hsa:5468%09red/hsa:5608%09red
Toxoplasmosis	hsa05145	12	113	2.03e-06	5.56e-05	HLA-DPB1|HLA-DRA|CD40LG|ALOX5|BIRC3|CD40|ITGA6|MAPK14|MAP2K6|HLA-DOB|HLA-DPA1|HLA-DMB	http://www.genome.jp/kegg-bin/show_pathway?hsa05145/hsa:1432%09red/hsa:330%09red/hsa:240%09red/hsa:959%09red/hsa:958%09red/hsa:3113%09red/hsa:3112%09red/hsa:3109%09red/hsa:3122%09red/hsa:3655%09red/hsa:3125%09red/hsa:5608%09red
Cell adhesion molecules (CAMs)	hsa04514	13	146	4.67e-06	0.000116915	HLA-DPB1|ICOS|CD40LG|NTNG2|LRRC4|CD40|ITGA6|HLA-DRA|ICAM2|HLA-DOB|HLA-DPA1|HLA-DMB|ITGAM	http://www.genome.jp/kegg-bin/show_pathway?hsa04514/hsa:3384%09red/hsa:29851%09red/hsa:64101%09red/hsa:3684%09red/hsa:959%09red/hsa:958%09red/hsa:3113%09red/hsa:3112%09red/hsa:3109%09red/hsa:3122%09red/hsa:84628%09red/hsa:3125%09red/hsa:3655%09red
Staphylococcus aureus infection	hsa05150	9	68	7.73e-06	0.000176684	FCAR|HLA-DPB1|HLA-DRA|C3AR1|C1QB|ITGAM|HLA-DOB|HLA-DPA1|HLA-DMB	http://www.genome.jp/kegg-bin/show_pathway?hsa05150/hsa:713%09red/hsa:3122%09red/hsa:3684%09red/hsa:719%09red/hsa:3113%09red/hsa:3112%09red/hsa:3109%09red/hsa:2204%09red/hsa:3125%09red
PI3K-Akt signaling pathway	hsa04151	20	354	1.11e-05	0.000243192	IL7R|IL2RB|THEM4|IL4R|FN1|GNG7|GNB5|CREB5|RPS6|THBS3|ITGA6|GNG11|TCL1A|CDK4|CSF3R|VEGFB|HGF|FLT3LG|MYC|ITGA7	http://www.genome.jp/kegg-bin/show_pathway?hsa04151/hsa:2323%09red/hsa:2788%09red/hsa:8115%09red/hsa:9586%09red/hsa:3560%09red/hsa:2791%09red/hsa:6194%09red/hsa:3679%09red/hsa:3575%09red/hsa:2335%09red/hsa:6654%09red/hsa:1019%09red/hsa:1441%09red/hsa:3566%09red/hsa:7423%09red/hsa:10681%09red/hsa:4609%09red/hsa:117145%09red/hsa:7059%09red/hsa:3655%09red
Allograft rejection	hsa05330	7	38	1.19e-05	0.000249748	HLA-DPB1|HLA-DRA|CD40LG|CD40|HLA-DOB|HLA-DPA1|HLA-DMB	http://www.genome.jp/kegg-bin/show_pathway?hsa05330/hsa:959%09red/hsa:958%09red/hsa:3113%09red/hsa:3112%09red/hsa:3109%09red/hsa:3122%09red/hsa:3125%09red
Leishmaniasis	hsa05140	9	74	1.44e-05	0.000290357	HLA-DPB1|HLA-DRA|CR1|NCF4|MAPK14|ITGAM|HLA-DOB|HLA-DPA1|HLA-DMB	http://www.genome.jp/kegg-bin/show_pathway?hsa05140/hsa:4689%09red/hsa:1432%09red/hsa:1378%09red/hsa:3684%09red/hsa:3113%09red/hsa:3112%09red/hsa:3109%09red/hsa:3122%09red/hsa:3125%09red
Complement and coagulation cascades	hsa04610	9	79	2.31e-05	0.000435818	CR2|ITGAX|CR1|F5|C3AR1|VSIG4|C1QB|ITGAM|SERPINB2	http://www.genome.jp/kegg-bin/show_pathway?hsa04610/hsa:3687%09red/hsa:1378%09red/hsa:3684%09red/hsa:1380%09red/hsa:719%09red/hsa:2153%09red/hsa:11326%09red/hsa:713%09red/hsa:5055%09red
NF-kappa B signaling pathway	hsa04064	10	100	2.32e-05	0.000435818	CD40LG|TRAF5|TRIM25|BIRC3|CD40|LTB|PRKCQ|LCK|IL1R1|BLNK	http://www.genome.jp/kegg-bin/show_pathway?hsa04064/hsa:3554%09red/hsa:29760%09red/hsa:5588%09red/hsa:7188%09red/hsa:959%09red/hsa:958%09red/hsa:3932%09red/hsa:7706%09red/hsa:4050%09red/hsa:330%09red
Tuberculosis	hsa05152	13	179	3.52e-05	0.000638091	ITGAX|HLA-DPB1|HLA-DRA|CR1|CAMK2D|CLEC4E|CTSD|MAPK14|ITGAM|HLA-DOB|HLA-DPA1|HLA-DMB|CD74	http://www.genome.jp/kegg-bin/show_pathway?hsa05152/hsa:26253%09red/hsa:1432%09red/hsa:972%09red/hsa:1378%09red/hsa:817%09red/hsa:3684%09red/hsa:3687%09red/hsa:3113%09red/hsa:3112%09red/hsa:1509%09red/hsa:3109%09red/hsa:3122%09red/hsa:3125%09red
Relaxin signaling pathway	hsa04926	11	130	3.85e-05	0.000675327	ACTA2|ADCY4|GNB5|CREB5|MMP9|GNG11|MAPK14|GNG7|PRKACB|VEGFB|HGF	http://www.genome.jp/kegg-bin/show_pathway?hsa04926/hsa:4318%09red/hsa:2788%09red/hsa:9586%09red/hsa:5567%09red/hsa:2791%09red/hsa:1432%09red/hsa:59%09red/hsa:6654%09red/hsa:7423%09red/hsa:196883%09red/hsa:10681%09red
Acute myeloid leukemia	hsa05221	8	66	4.39e-05	0.000744423	TCF7|CEBPE|CCNA1|MPO|ITGAM|HGF|MYC|LEF1	http://www.genome.jp/kegg-bin/show_pathway?hsa05221/hsa:1053%09red/hsa:3684%09red/hsa:6654%09red/hsa:51176%09red/hsa:4609%09red/hsa:6932%09red/hsa:8900%09red/hsa:4353%09red
PD-L1 expression and PD-1 checkpoint pathway in cancer	hsa05235	9	89	5.46e-05	0.000896956	BATF|RASGRP1|LCK|MAPK14|CD247|MAP2K6|PRKCQ|CD3D|CD3E	http://www.genome.jp/kegg-bin/show_pathway?hsa05235/hsa:919%09red/hsa:5588%09red/hsa:10125%09red/hsa:1432%09red/hsa:915%09red/hsa:916%09red/hsa:3932%09red/hsa:10538%09red/hsa:5608%09red
Chemokine signaling pathway	hsa04062	13	190	6.25e-05	0.000995627	ADCY4|ITK|GNG7|GNB5|PRKACB|GNG11|PRKCD|CCR1|PF4|CCR6|CCR7|HGF|CXCL16	http://www.genome.jp/kegg-bin/show_pathway?hsa04062/hsa:1230%09red/hsa:2788%09red/hsa:1236%09red/hsa:1235%09red/hsa:2791%09red/hsa:3702%09red/hsa:5567%09red/hsa:58191%09red/hsa:6654%09red/hsa:5196%09red/hsa:5580%09red/hsa:196883%09red/hsa:10681%09red
Small cell lung cancer	hsa05222	9	93	7.47e-05	0.00115556	TRAF5|FN1|GADD45A|BIRC3|ITGA6|GADD45G|CDK4|MYC|FHIT	http://www.genome.jp/kegg-bin/show_pathway?hsa05222/hsa:1647%09red/hsa:2335%09red/hsa:7188%09red/hsa:1019%09red/hsa:2272%09red/hsa:4609%09red/hsa:10912%09red/hsa:330%09red/hsa:3655%09red
Autoimmune thyroid disease	hsa05320	7	53	8.07e-05	0.00117853	HLA-DPB1|HLA-DRA|CD40LG|CD40|HLA-DOB|HLA-DPA1|HLA-DMB	http://www.genome.jp/kegg-bin/show_pathway?hsa05320/hsa:959%09red/hsa:958%09red/hsa:3113%09red/hsa:3112%09red/hsa:3109%09red/hsa:3122%09red/hsa:3125%09red
HIF-1 signaling pathway	hsa04066	8	109	0.00103589	0.00972995	TIMP1|CAMK2D|PFKFB3|MKNK1|HMOX1|RPS6|ALDOC|LDHB	http://www.genome.jp/kegg-bin/show_pathway?hsa04066/hsa:230%09red/hsa:3945%09red/hsa:8569%09red/hsa:817%09red/hsa:6194%09red/hsa:7076%09red/hsa:3162%09red/hsa:5209%09red
